# Supplementary material for: HIV-specific CD8+ T-cell proliferative response 24 weeks after early antiretroviral therapy initiation is associated with the subsequent reduction in the viral reservoir
Source: eLife. 2026 Jan 23;14:RP106402. doi: 10.7554/eLife.106402 (PMC12829989; doi:10.7554/eLife.106402)
Supplement: Figure 1—source data 1. [file elife-106402-fig1-data1.xlsx]

## Sheet: Fig 1
ID	VL_baseline	VL 24wk	VL 156wk	CD4_baseline	CD4 24wk	CD4 156wk	CD4/CD8 ratio_baseline	CD4/CD8 ratio 24/CD8 ratiowk	CD4/CD8 ratio 156wk
1	10000000	40	40	120	610	670	0.26	0.36	0.46
2	843528	40	40	600	800	770	0.35	1.13	1.05
7	371055	40	40	610	1060	620	0.29	0.61	1.26
9	378112	40	40	500	430	660	0.23	1.14	0.74
10	10000000	200	100	400	430	630	0.78	1.81	1.25
11	300000	40	40	470	670	720	0.62	1.26	1.34
13	10000000	20	20	330	550	450	0.4	1.1	1
14	69100	20	20	540	720	860	0.4	1	1.2
16	43200	20	20	890	1240	1270	1	1.5	2
17	10000000	74	98	270	710	340	0.5	1.2	0.2
20	4900000	30	30	280	330	540	0.2	0.6	0.6
21	211000	30	30	300	690	470	0.5	1.5	1.8
