# Supplementary material for: HIV-specific CD8+ T-cell proliferative response 24 weeks after early antiretroviral therapy initiation is associated with the subsequent reduction in the viral reservoir
Source: eLife. 2026 Jan 23;14:RP106402. doi: 10.7554/eLife.106402 (PMC12829989; doi:10.7554/eLife.106402)
Supplement: Figure 2—figure supplement 1—source data 1. [file elife-106402-fig2-figsupp1-data1.xlsx]

## Sheet: Fig 2 fig suppl 1
qVOA+	qVOA-
115.95	30.76
394.44	40.33
340.39	22.6
421.08	27.84
126.31	36.17
12.13	16.68
	6.23
	13.05
	58
	48.18
	90.09
	143.18
	74.32
	19.18
