# Supplementary material for: HIV-specific CD8+ T-cell proliferative response 24 weeks after early antiretroviral therapy initiation is associated with the subsequent reduction in the viral reservoir
Source: eLife. 2026 Jan 23;14:RP106402. doi: 10.7554/eLife.106402 (PMC12829989; doi:10.7554/eLife.106402)
Supplement: Figure 2—source data 1. [file elife-106402-fig2-data1.xlsx]

## Sheet: Fig 2
24w						156w
US RNA	Total DNA	Intact DNA	3' defective DNA	5' defective DNA		US RNA	Total DNA	Intact DNA	3' defective DNA	5' defective DNA
36.88	192.78	30.76	15.31	38.62		11.7	56.55	13.17	5	46.67
0.61	30.99	115.95	4.86	1197.89		0.68	38.2	101.48	5	278.05
48.58	244.74	40.33	13.5	46.85		85.53	282.41	41.78	104.25	10.46
0.53	3.19	22.6	7.94	80.33		2.43	52.65	8	8	16
0.45	28.99	27.84	7.04	183.55		197.28	211.09	68.57	171.43	11.43
48.8	295.99	36.17	181.92	53.93		0.71	3.13	121.5	5	40
34.4	1024.21	394.44	465.83	215.29		130	180.97	8.25	82.1	33.2
0.73	68.04	16.68	58.37	33.36		705.12	707.14	9.16	175.93	18.11
1.23	48.64	6.23	6.23	16.2		67.48	270.53	14.14	35.71	21
128.03	1190.08	13.05	726.9	13		44.72	6.3	19.1	19	12.8
0.63	2.59	58	5	14		209.25	180.32	54.08	79.77	47.06
253.13	2908.3	48.18	1345.93	40		120.21	147.79	27.33	61.62	47.73
108.9	111.39	90.09	90.29	25.68		37.42	39.87	20.51	34.38	13.6
75.68	91.13	143.18	156.82	6.82		1.01	8.68	25.86	19.29	39
63.36	270.48	74.32	16.36	25
67.83	755.33	340.39	309.22	170
81.91	602.77	421.08	137.85	120
6.43	177.26	19.18	670.83	12.8
19.53	878.85	126.31	81.29	26.09
0.62	3.99	12.13	6	36.75
