# Supplementary material for: HIV-specific CD8+ T-cell proliferative response 24 weeks after early antiretroviral therapy initiation is associated with the subsequent reduction in the viral reservoir
Source: eLife. 2026 Jan 23;14:RP106402. doi: 10.7554/eLife.106402 (PMC12829989; doi:10.7554/eLife.106402)
Supplement: Figure 3—source data 1. [file elife-106402-fig3-data1.xlsx]

## Sheet: Fig 3
US 24	US 156	TD 24	TD 156	US/TD 24	US/TD 156	INT 24	INT 156	3' DEF 24	3' DEF 156	5' DEF 24	5' DEF 156	DEF 24	DEF 156
253	705	2910	707	0.09	1	48.2	9.16	1350	176	40	18.1	1390	194
109	67.5	111	271	0.98	0.25	90.1	14.1	90.3	35.7	25.7	21	116	56.7
63.4	44.7	270	6.3	0.23	7.1	74.3	19.1	16.4	19	25	12.8	41.4	31.8
67.8	209	755	180	0.09	1.16	340	54.1	309	79.8	170	47.1	479	127
6.43	37.4	177	39.9	0.04	0.94	19.2	20.5	671	34.4	12.8	13.6	684	48
36.9	11.7	193	56.6	0.19	0.21	30.8	13.2	15.3	5	38.6	46.7	53.9	51.7
0.613	0.681	31	38.2	0.02	0.02	116	101	4.86	5	1200	278	1200	283
34.4	85.5	1020	282	0.03	0.3	394	41.8	466	104	215	10.5	681	115
1.23	2.43	48.6	52.6	0.03	0.05	6.23	8	6.23	8	16.2	16	22.4	24
128	197	1190	211	0.11	0.93	13	68.6	727	171	13	11.4	740	183
0.635	0.705	2.59	3.13			58	122	5	5	14	40	19	45
19.53	1.01	878.85	8.68	0.02	0.12	126	25.9	81.3	19.3	26.1	39	107	58.3
