# Supplementary material for: HIV-specific CD8+ T-cell proliferative response 24 weeks after early antiretroviral therapy initiation is associated with the subsequent reduction in the viral reservoir
Source: eLife. 2026 Jan 23;14:RP106402. doi: 10.7554/eLife.106402 (PMC12829989; doi:10.7554/eLife.106402)
Supplement: Figure 4—source data 2. [file elife-106402-fig4-data2.xlsx]

## Sheet: Figure 4B
ID	HIV-dex_24wk	HIV-dex_156wk	PD1_HIV-dex_24wk	PD1_HIV-dex_156wk	CTLA4_HIV-dex_24wk	CTLA4_HIV-dex_156wk	CD160_HIV-dex_24wk	CD160_HIV-dex_156wk	CD28-_HIV-dex_24wk	CD28-_HIV-dex_156wk
2	0.071	0.11	9.59	8.86	2.74	2.53	6.85	3.8	16.4	27.8
7	0.36	0.054	1.92	19.4	5.77	3.23		3.23	26.9	12.9
9	0.12	0.11		10	28	5		15	32	30
9	2.59	1.01	12.5	9.43	2.61	1.23	4.36	11.1	15.3	15.6
10	0.039	0.038				3.57		3.57	23.5	35.7
13	0.15	0.12	12.8	1.85	2.56	1.85	12.8		28.2	40.7
13	0.066	0.055	5.8	9.43	4.35		2.9	2.83	31.9	36.8
16	0.047	0.044	10				6.67		30	30.6
16	0.11	0.052	7.04	2.56	2.82		7.04		29.6	41
17	0.031	0.15		6.94		4.17		15.3	100	23.6
17	2.23	0.82	11.1	1.88		1.34	1.05	34.7	90	6.99
20	0.031	0.03		17.2	28.6		7.14		21.4	13.8
21	0.026	0.058	10	21.4		7.14			20	21.4
