# Supplementary material for: HIV-specific CD8+ T-cell proliferative response 24 weeks after early antiretroviral therapy initiation is associated with the subsequent reduction in the viral reservoir
Source: eLife. 2026 Jan 23;14:RP106402. doi: 10.7554/eLife.106402 (PMC12829989; doi:10.7554/eLife.106402)
Supplement: Figure 4—source data 3. [file elife-106402-fig4-data3.xlsx]

## Sheet: Figure 4C
ID	IFNg-cells_24wk	IFNg-cells_156wk	Reactive CD8-cells_24wk	Reactive CD8-cells_156wk	CD8precursor-cells_24wk	CD8precursor-cells_156wk	CD8proliferation-cells_24wk	CD8proliferation-cells_156wk
1	78.08	131.99	0.05	0.001	3.78	0.001	5.61	8.96
2	7.23	78.87	0.07	0.03	0.61	2.52	9.57	13.65
7	11.53	23.05	0.09	0.02	0.49	1.41	19.29	22.03
9	3.42	19.29	1.04	0.05	0.22	1.82	2.58	20.1
13	17.73	0.86	0.13	0.04	1.17	0.35	26.93	3.99
14	2.12	3.47	0.08	0.001	0.001	0.12	1.25	2.24
16	1.92	1.11	0.12	0.02	0.04	0.61	1.29	9.64
17	0.44	0.4	0.01	0.83	0.001	0.6	0.03	8.35
20	0.4	0.4	0.08	0.09	0.25	0.08	2.86	0.17
21	31.237	54.9	0.017	0.43	0.321	1.31	4.755	1.34
10	15.42	6.25	0.001	0.17	0.93	0.45	11.69	3.01
11	35.83	0.4	0.11	0.01	0.001	0.001	0.001	0.001
