# Supplementary material for: HIV-specific CD8+ T-cell proliferative response 24 weeks after early antiretroviral therapy initiation is associated with the subsequent reduction in the viral reservoir
Source: eLife. 2026 Jan 23;14:RP106402. doi: 10.7554/eLife.106402 (PMC12829989; doi:10.7554/eLife.106402)
Supplement: Figure 5—figure supplement 1—source data 1. [file elife-106402-fig5-figsupp1-data1.xlsx]

## Sheet: Fig 5 fig suppl 1
ID	Timepoint	total HIV-DNA	intact provirus	defect provirus	US-RNA	US/TD ratio	total LTR circles	2-LTR circles	HIV-dex+
2	24	30.99	115.95	1202.75	0.61	0.02	118.69	3.84	0.071
4	24	3.19	22.6	88.27	0.53	0.17	7.07	0.8	1.23
5	24	28.99	27.84	190.59	0.45	0.02	0.93	0.93	0.3
6	24	295.99	36.17	235.85	48.8	0.16	85.26	4.09	0.056
7	24	1024.21	394.44	681.13	34.4	0.03	224.53	52.37	0.36
9	24	48.64	6.23	22.43	1.23	0.03	3.06	0.86	2.59
10	24	1190.08	13.05	739.9	128.03	0.11	159.78	0.62	0.039
13	24	2908.3	48.18	1385.93	253.13	0.09	11.25	3.95	0.066
16	24	270.48	74.32	41.36	63.36	0.23	17.26	1.1	0.11
17	24	755.33	340.39	479.22	67.83	0.09	76.84	1.27	2.23
18	24	602.77	421.08	257.85	81.91	0.14	59.98	1.15	0.017
20	24	177.26	19.18	683.63	6.43	0.04	305.11	3.64	0.031
21	24	878.85	126.31	107.38	19.53	0.02	148.61	1.2	0.026
2	156	38.2	101.48	283.05	0.68	0.02	23.11	0.93	0.11
7	156	282.41	41.78	114.72	85.53	0.3	23.65	12.94	0.054
9	156	52.65	8	24	2.43	0.05	0.68	0.68	1.01
10	156	211.09	68.57	182.86	197.28	0.93	4.26	0.55	0.038
13	156	707.14	9.16	194.03	705.12	1	206.01	37.96	0.12
16	156	6.3	19.1	31.8	44.72	7.1	1.58	1.58	0.052
17	156	180.32	54.08	126.83	209.25	1.16	67.47	21.95	0.82
20	156	39.87	20.51	47.98	37.42	0.94	7.01	7.01	0.03
21	156	8.68	25.86	58.29	1.01	0.12	0.63	0.63	0.058
