# Supplementary material for: HIV-specific CD8+ T-cell proliferative response 24 weeks after early antiretroviral therapy initiation is associated with the subsequent reduction in the viral reservoir
Source: eLife. 2026 Jan 23;14:RP106402. doi: 10.7554/eLife.106402 (PMC12829989; doi:10.7554/eLife.106402)
Supplement: Figure 5—source data 1. [file elife-106402-fig5-data1.xlsx]

## Sheet: Fig 5
24w								156w
US RNA	Total DNA	Intact DNA	Defective DNA	IFN-gamma release	CD8 T-cell reactivity	CD8 T-cell proliferation		US RNA	Total DNA	Intact DNA	Defective DNA	IFN-gamma release	CD8 T-cell reactivity	CD8 T-cell proliferation
36.88	192.78	30.76	53.93	78.08	0.05	5.61		11.7	56.55	13.17	51.67	131.99	0	8.96
0.61	30.99	115.95	1202.75	7.23	0.07	9.57		0.68	38.2	101.48	283.05	78.87	0.03	13.65
34.4	1024.21	394.44	681.13	11.53	0.09	19.29		85.53	282.41	41.78	114.72	23.05	0.02	22.03
1.23	48.64	6.23	22.43	3.42	1.04	2.58		2.43	52.65	8	24	19.29	0.05	20.1
128.03	1190.08	13.05	739.9	15.42	0	11.69		197.28	211.09	68.57	182.86	6.25	0.17	3.01
0.63	2.59	58	19	35.83	0.11	0		0.71	3.13	121.5	45	0.4	0.01	0
253.13	2908.3	48.18	1385.93	17.73	0.13	26.93		705.12	707.14	9.16	194.03	0.86	0.04	3.99
108.9	111.39	90.09	115.98	2.12	0.08	1.25		67.48	270.53	14.14	56.71	3.47	0	2.24
63.36	270.48	74.32	41.36	1.92	0.12	1.29		44.72	6.3	19.1	31.8	1.11	0.02	9.64
67.83	755.33	340.39	479.22	0.44	0.01	0.03		209.25	180.32	54.08	126.83	0.4	0.83	8.35
6.43	177.26	19.18	683.63	0.4	0.08	2.86		37.42	39.87	20.51	47.98	0.4	0.09	0.17
19.53	878.85	126.31	107.38	31.237	0.017	4.755		1.01	8.68	25.86	58.29		0.43	1.34
