# Supplementary material for: HIV-specific CD8+ T-cell proliferative response 24 weeks after early antiretroviral therapy initiation is associated with the subsequent reduction in the viral reservoir
Source: eLife. 2026 Jan 23;14:RP106402. doi: 10.7554/eLife.106402 (PMC12829989; doi:10.7554/eLife.106402)
Supplement: Table 1—source data 1. [file elife-106402-table1-data1.xlsx]

## Sheet: Table 1
ID	Age(baseline)	VL(baseline)	CD4(baseline)	paired analysis
1	47	10000000	120	y
2	47	843528	600	y
3	42	2563	610	n
4	58	10000000	290	n
5	24	20085	480	n
6	27	19397	360	n
7	21	371055	610	y
8	36	919679	270	n
9	20	378112	500	y
10	54	10000000	400	y
11	23	300000	470	y
12	47	43300	570	n
13	28	10000000	330	y
14	25	69100	540	y
15	32	44900	410	n
16	56	43200	890	y
17	55	10000000	270	y
18	34	35400	420	n
19	48	10500000	770	n
20	40	4900000	280	y
21	41	211000	300	y
22	34	10000000	810	n
