# Supplementary material for: HIV-specific CD8+ T-cell proliferative response 24 weeks after early antiretroviral therapy initiation is associated with the subsequent reduction in the viral reservoir
Source: eLife. 2026 Jan 23;14:RP106402. doi: 10.7554/eLife.106402 (PMC12829989; doi:10.7554/eLife.106402)
Supplement: Table 2—source data 1. [file elife-106402-table2-data1.xlsx]

## Sheet: Table 2
US_delta	TOTAL_delta	INTACT_delta	DEF_TOTAL_delta	IFN_24	CD8_AIM_24	CD8_PREC_24	CD8_PROLIF_24	age_24	NRTI_bb_24
25.18	136.23	17.59	2.26	78.08	0.05	3.78	5.61	47	ABC_3TC
	-7.21	14.47	919.7	7.23	0.07	0.61	9.57	47	ABC_3TC
-51.13	741.81	352.66	566.41	11.53	0.09	0.49	19.29	21	ABC_3TC
-1.2	-4.01	-1.77	-1.57	3.42	1.04	0.22	2.58	21	ABC_3TC
-69.25	978.99	-55.52	557.05	15.42	0	0.93	11.69	55	FTC_TDF
		-63.5	-26	35.83	0.11	0	0	24	FTC_TAF
-451.98	2201.15	39.02	1191.9	17.73	0.13	1.17	26.93	29	ABC_3TC
41.42	-159.14	75.95	59.26	2.12	0.08	0	1.25	26	FTC_TDF
18.64	264.18	55.22	9.56	1.92	0.12	0.04	1.29	56	FTC_TDF
-141.42	575.01	286.3	352.39	0.44	0.01	0	0.03	56	FTC_TDF
-30.98	137.39	-1.33	635.66	0.4	0.08	0.25	2.86	40	ABC_3TC
18.52	870.17	100.45	49.09	31.24	0.02	0.32	4.76	41	FTC_TDF
